# Supplementary material for: Presynaptic Expression of LRIT3 Transsynaptically Organizes the Postsynaptic Glutamate Signaling Complex Containing TRPM1
Source: PubMed Central journal article supplement — Cell Rep. Author manuscript; Available in PMC 2019 Jul 15. (PMC6628893; doi:10.1016/j.celrep.2019.05.056), 2019-06-11
Supplement: NIHMS1531692-supplement-1.pdf [file NIHMS1531692-supplement-1.pdf]

**Cell Reports, Volume 27**

**Supplemental Information**

**Presynaptic Expression of LRIT3**

**Transsynaptically Organizes the Postsynaptic**

**Glutamate Signaling Complex Containing TRPM1**

**Nazarul Hasan, Gobinda Pangani, Catherine A. Cobb, Thomas A. Ray, Emily R. Nettesheim, Kristina J. Ertel, Daniel M. Lipinski, Maureen A. McCall, and Ronald G. Gregg**

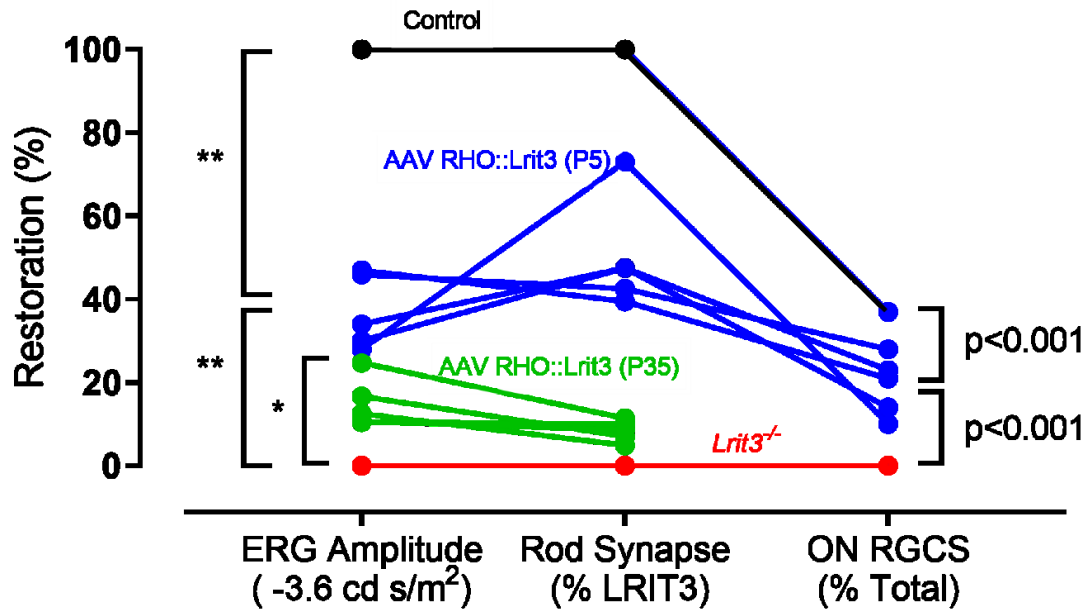

**Figure S1 related to Figures 1,3,4,5. Relationship between ERG b-wave amplitude, rod synapse rescue and ON RGC numbers.** The rescue of the scotopic ERG b-wave correlates with the percent of rod photoreceptors transduced with rAAV RHO::Lrit3 at P5 (blue symbols and lines) and P35 (green symbols and lines) and for the P5 animals the number of ON RGCs. The RGC data is the percent of all RGCs that are ON RGCs. Statistics were done on the actual values for the b-wave amplitudes and ON RGCs proportions. For the ERG data a test for the P5 RHO::LRIT3 (n=5) vs WT (n=3) was done. For AAV RHO::LRIT3 vs *Lrit3*<sup>-/-</sup> a one sample t-test comparing the b-wave to 0 was done, because the *Lrit3*<sup>-/-</sup> mice have no b-wave. For the proportions of ON RGCs in the WT, *Lrit3*<sup>-/-</sup> and AAV RHO::LRIT3 Fishers exact test comparing actual proportions of ON RGCs was used. The AAV RHO::LRIT3 treatment of *Lrit3*<sup>-/-</sup> retinas significantly increased the ERG scotopic b-wave, but did not restore it to the WT. Similarly, this treatment increased the proportion of ON RGCs present, but not to the WT levels. Both these observations are consistent with the restoration of LRIT3 to approximately 50% of the rods in these mice.

**Table S1 related to Figure 4. Cell types recorded in control, *Lrit3*<sup>-/-</sup> and rAAV RHO::*Lrit3* treated *Lrit3*<sup>-/-</sup> retinas.**

| Genotype/Stimulus                                 | ON  | ON/OFF | OFF | dON | dON/OFF | NR  | Total |
|---------------------------------------------------|-----|--------|-----|-----|---------|-----|-------|
| <b>Scotopic</b>                                   |     |        |     |     |         |     |       |
| Control                                           | 101 | 63     | 34  | 0   | 0       | 78  | 276   |
| <i>Lrit3</i> <sup>-/-</sup>                       | 0   | 0      | 17  | 10  | 1       | 349 | 377   |
| RHO:: <i>Lrit3</i> in <i>Lrit3</i> <sup>-/-</sup> | 87  | 9      | 18  | 16  | 13      | 333 | 476   |
| <b>Photopic</b>                                   |     |        |     |     |         |     |       |
| Control                                           | 82  | 100    | 24  | 0   | 0       | 4   | 210   |
| <i>Lrit3</i> <sup>-/-</sup>                       | 0   | 0      | 142 | 0   | 4       | 231 | 377   |
| RHO:: <i>Lrit3</i> in <i>Lrit3</i> <sup>-/-</sup> | 7   | 2      | 147 | 1   | 12      | 307 | 476   |
